# Supplementary material for: SPR-based fragment screening with neurotensin receptor 1 generates novel small molecule ligands
Source: PLOS journal article supplement (doi:10.1371/journal.pone.0175842), 2017-05-16
Supplement: S2 (10.1371/journal.pone.0175842.s002) [file journal.pone.0175842.s002]

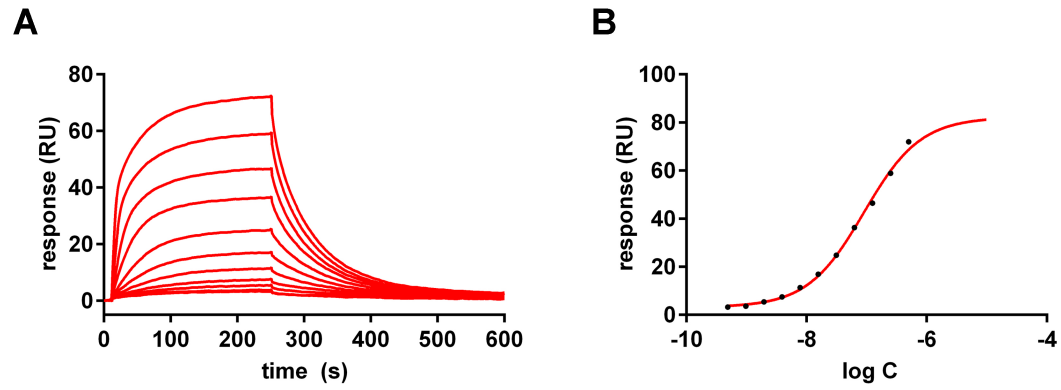

**S1 Fig. Binding of NT<sub>8-13</sub>A<sub>11,12</sub> to NTS1-H4.** (A) dose-response titration of NT<sub>8-13</sub>A<sub>11,12</sub> over high density NTS1-H4 surface monitored by peptide titration up to 500 nM (dilution factor 2). (B) Sigmoidal dose-response curve and mathematical fit for one-to-one interaction with a maximal signal calculated theoretically. The apparent affinity constant ( $K_D$ ) was estimated to be 90 nM.
