# Supplementary material for: SPR-based fragment screening with neurotensin receptor 1 generates novel small molecule ligands
Source: PLOS journal article supplement (doi:10.1371/journal.pone.0175842), 2017-05-16
Supplement: S5 (10.1371/journal.pone.0175842.s005) [file journal.pone.0175842.s005]

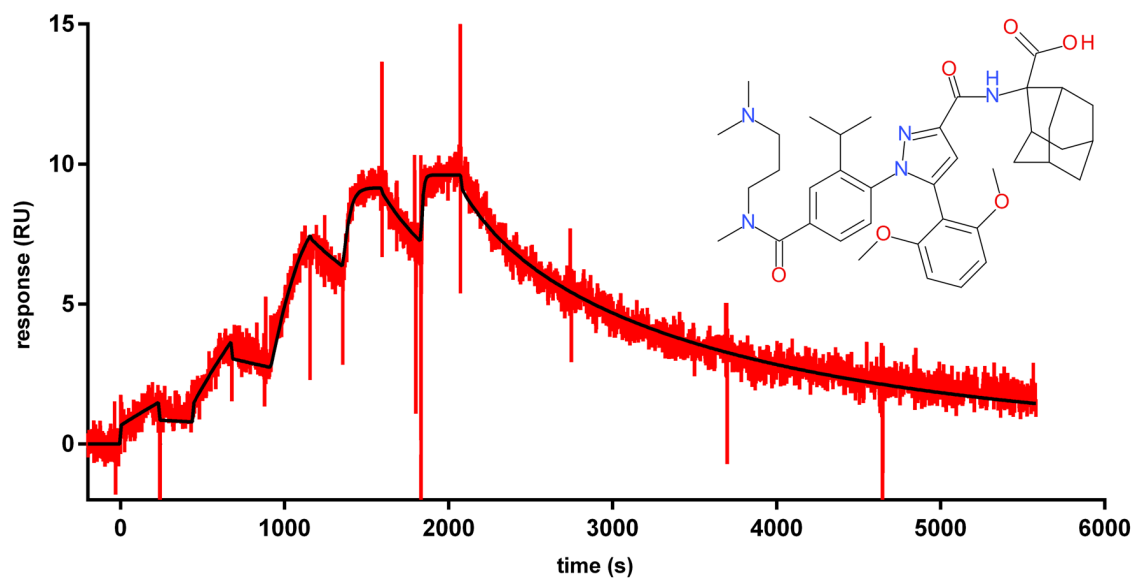

S1 Fig. Titration of SR142948 antagonist up to 25 nM over the NTS1-H4 surface monitored in single cycle kinetic mode (red curve) overlaid with the calculated curve for a one-to-one interaction (black curve) and structure of the SR142948 antagonist.
